# Supplementary material
Source: PubMed Central journal article supplement (PMC8030703)
Supplement: jiaa802_suppl_supplementary_figure_s1.pdf [file jiaa802_suppl_supplementary_figure_s1.pdf]

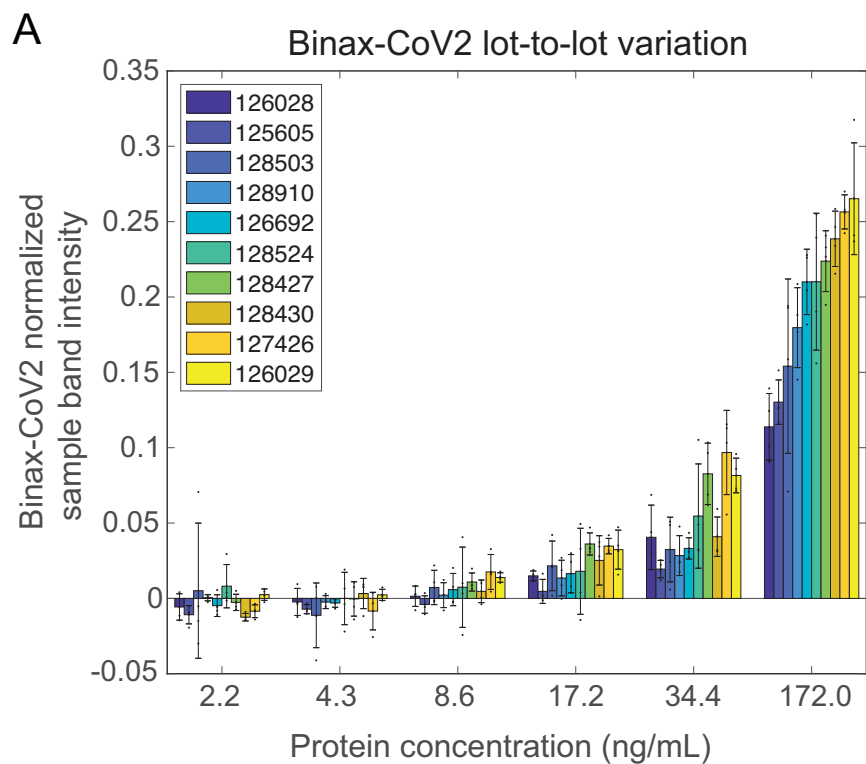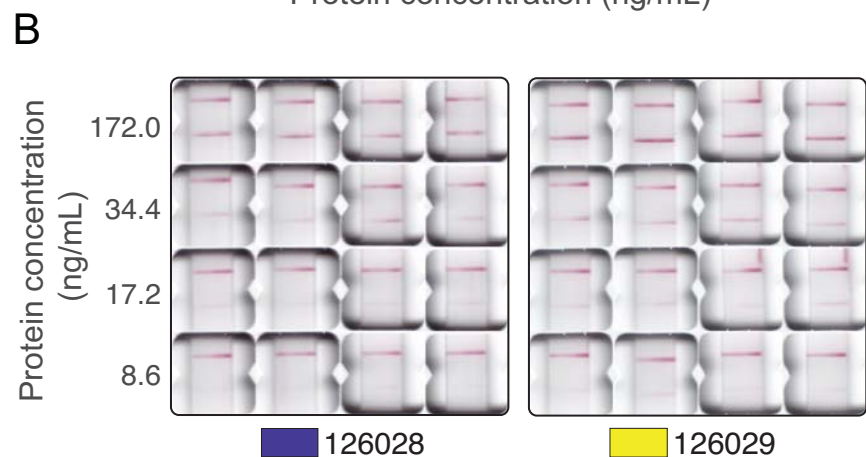

**Supplementary Figure 1. Variability of signal intensity in Binax-CoV2 card lots.** (A) Normalized sample band signal intensity of Binax-CoV2 cards from different lots run with a dilution series of purified SARS-CoV-2 N protein with known concentration. N=4 cards per lot per concentration. Each point represents one card. (B) Images of each card test for the highest (126029) and lowest (126028) performing lots.
